# Supplementary material for: Potentiation of apoptosis by histone deacetylase inhibitors and doxorubicin combination: cytoplasmic cathepsin B as a mediator of apoptosis in multiple myeloma
Source: PubMed Central journal article supplement (PMC3065279; doi:10.1038/bjc.2011.42), 2011-03-01
Supplement: bjc201142x1.pdf [file bjc201142x1.pdf]

## Supplemental Figure 1

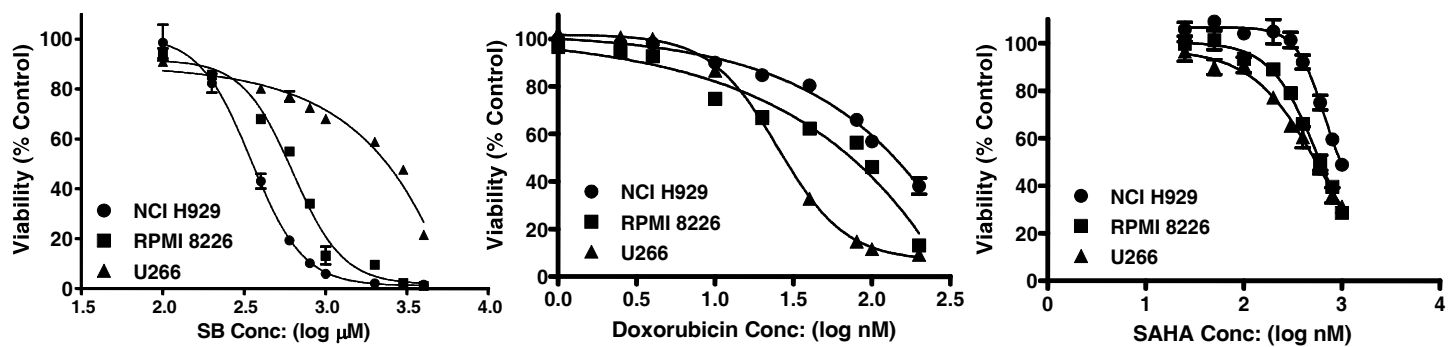

# Supplemental Figure 2

**A**

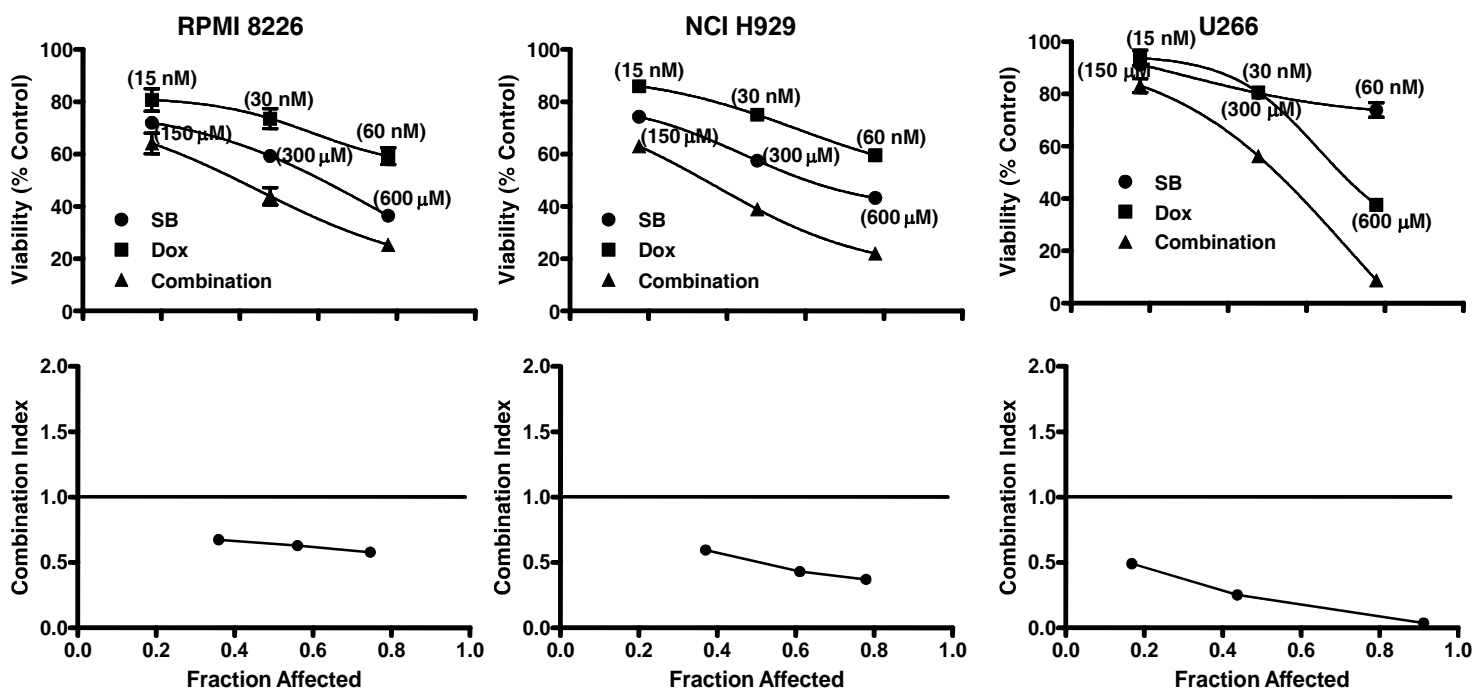

**B**

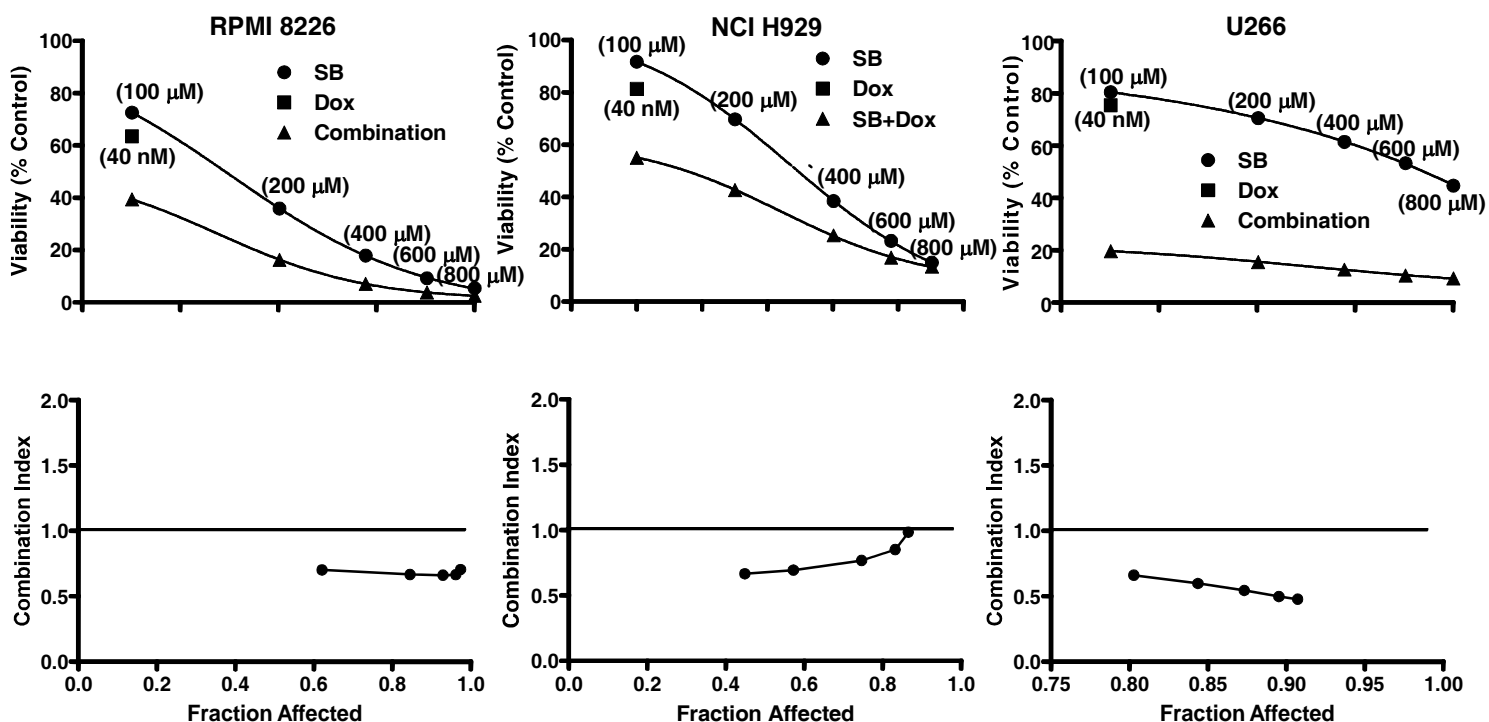

### Supplemental Figure 3

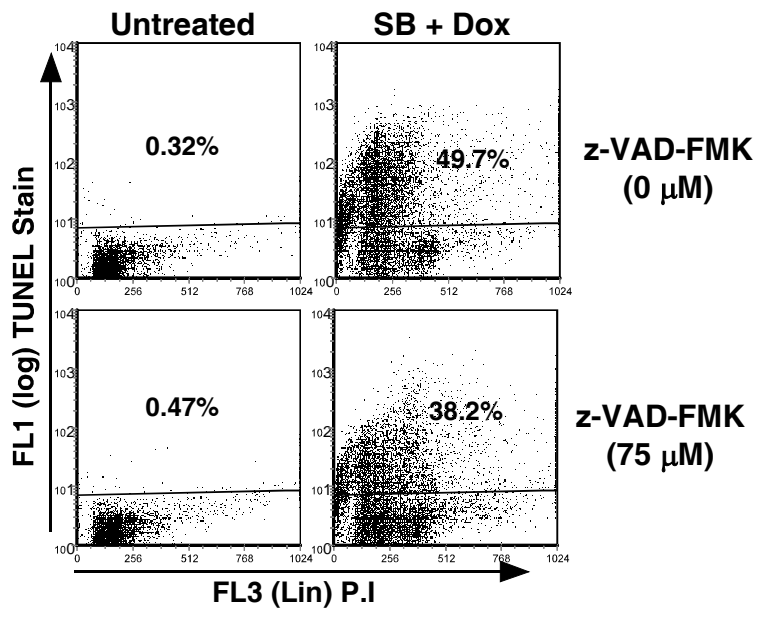

**Supplemental Table 1**

| <b>Cell Lines</b> | <b>IC<sub>50</sub></b> |                         |                  |
|-------------------|------------------------|-------------------------|------------------|
|                   | <b>SB (mM)</b>         | <b>Doxorubicin (nM)</b> | <b>SAHA (nM)</b> |
| NCI H929          | 0.35                   | 167                     | 546              |
| RPMI 8226         | 0.63                   | 101                     | 611              |
| U266              | 0.90                   | 29                      | 976              |

## Supplemental Table 2: Characteristics of myeloma patients

| Sample # | Gender | Age | Disease Stage | Cytogenetics      | Prior or Current Therapies |
|----------|--------|-----|---------------|-------------------|----------------------------|
| P01      | Female | 57  | MM            | ND                | Cis, Eto, Ar               |
| P02      | Male   | 53  | MM            | ND                | Doxil, Dex, Cyto, Rev      |
| P03      | Female | 63  | MM            | ND                | Rev, Dex                   |
| P04      | Male   | 57  | MM            | ND                | Dex                        |
| P05      | Male   | 58  | MM            | ND                | Thal, Pred, Rev, Dex       |
| P06      | Male   | 44  | MM            | ND                | None                       |
| P07      | Female | 69  | MM            | ND                | DVD-T, Ar, Pred            |
| P08      | Female | 68  | MM            | ND                | Vel, Rev, SAHA+Vel         |
| P09      | Female | 54  | PCL           | Monosomy 13       | Vel                        |
| P10      | Female | 42  | MM, PCM       | T(11;14)(q13;q32) | Cyto, Cis, Dec, Vel        |
| P11      | Male   | 56  | MM            | Normal            | Reglan, Dec                |
| P12      | Male   | 78  | MM            | Normal            | None                       |
| P13      | Female | 60  | MM            | t(4-14)           | None                       |
| P14      | Male   | 60  | MM            | Normal            | Vel                        |
| P15      | Female | 51  | MGUS          | Normal            | Cyto, Vel, Doxil, Rev      |
| P16      | Female | 68  | MM            | 17(p13)           | Pred, Doxil, Vel           |
| P17      | Male   | 64  | MM            | Loss of Y         | Vel                        |
| P18      | Female | 71  | MM            | Normal            | None                       |
| P19      | Male   | 71  | MGUS          | IgH(14q32)        | Vel                        |
| P20      | Male   | 61  | MM, PCM       | ND                | Vel, Dex                   |
| P21      | Male   | 61  | MM            | t(4-14)           | Vel, Cyt, Thal             |
| P22      | Male   | 78  | MM            | Normal            | Vel, Thal                  |
| P23      | Female | 60  | MM            | Normal            | None                       |
| P24      | Female | 60  | MM            | ND                | Rev                        |
| P25      | Male   | 65  | MM            | ND                | Thal                       |

### Abbreviations:

**Disease stage:** PCL - Plasma Cell leukemia, MM - Multiple Myeloma, PCM - Plasma cytoma, MGUS- Monoclonal gammopathy of undetermined significance.

**Drugs:** Vel-Velcade, Cis -Cisplatin, Dec-Decadron, Thal - Thalidomide, Rev - Revlimide, Vin - Vincristine, Pred-Prednisone, Doxil-liposomal doxorubicin.
